# Supplementary material for: Potent Anti-Inflammatory Activity of Pyrenocine A Isolated from the Marine-Derived FungusPenicillium paxilliMa(G)K
Source: Hindawi journal article supplement (doi:10.1155/2014/767061), 2014-01-01

# Supplemental data Figure 1A

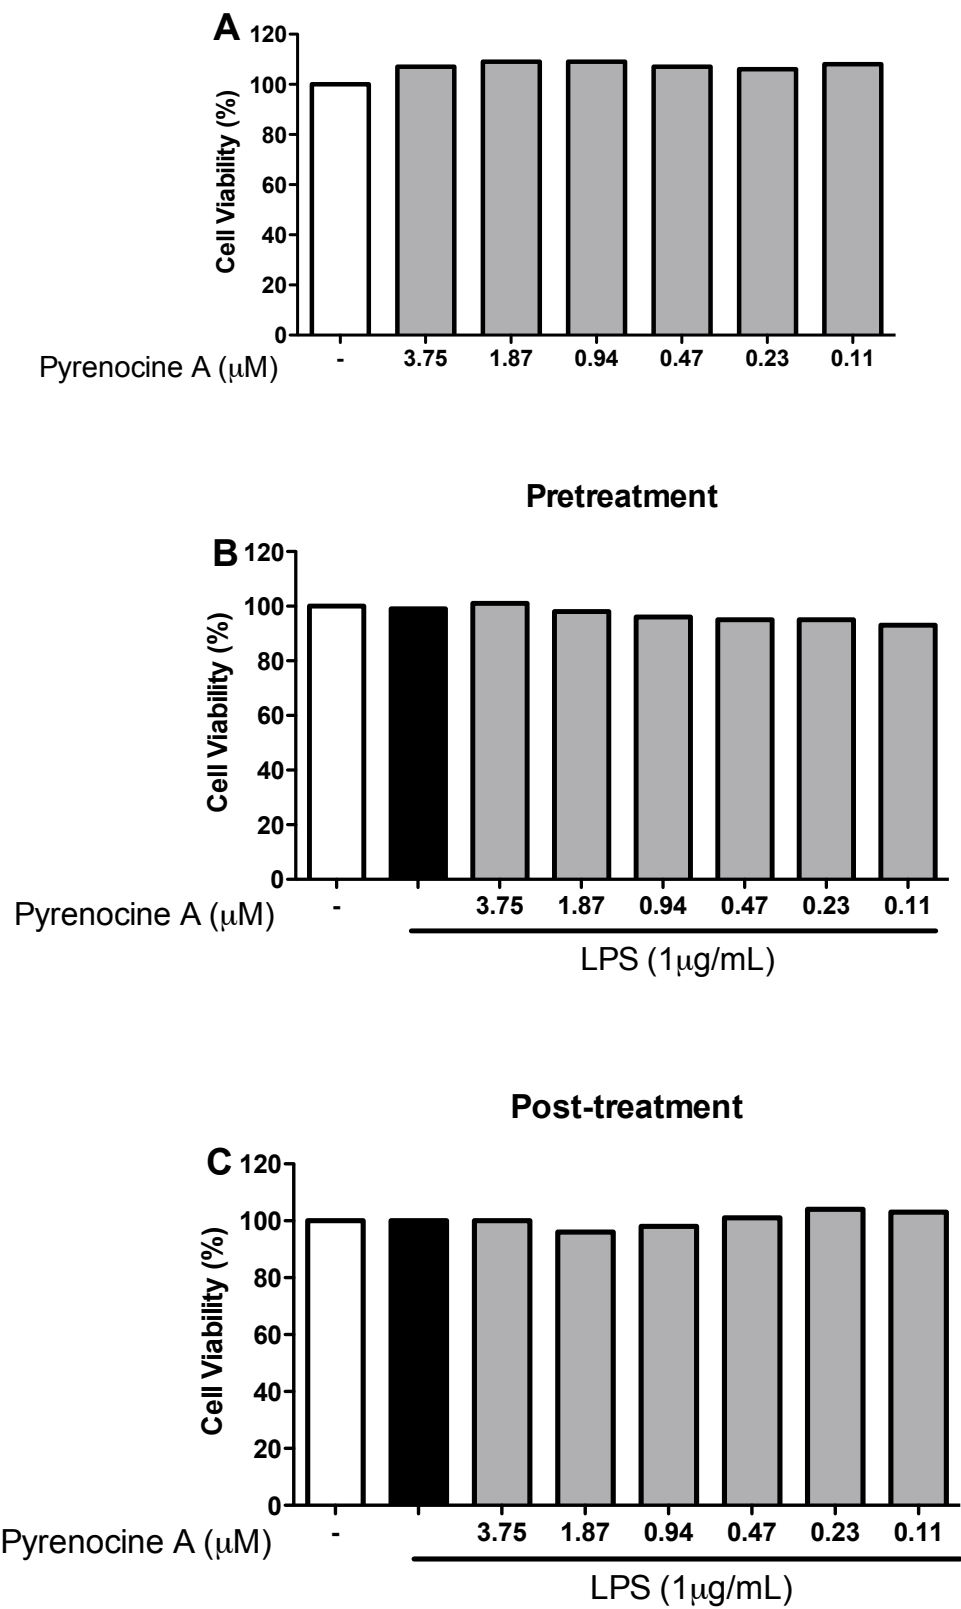

Supplement: f1 [file 767061.f1.pdf]
