# Supplementary material for: Potent Anti-Inflammatory Activity of Pyrenocine A Isolated from the Marine-Derived FungusPenicillium paxilliMa(G)K
Source: Hindawi journal article supplement (doi:10.1155/2014/767061), 2014-01-01
Supplement: f2 [file 767061.f2.pdf]

LPS (1 $\mu$ g/mL)

Control

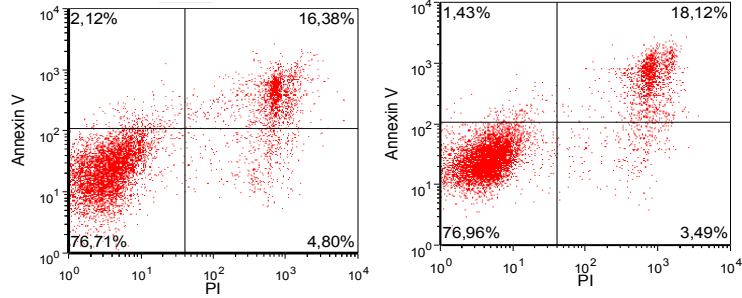

Pre-treatment

Post-treatment

3.75

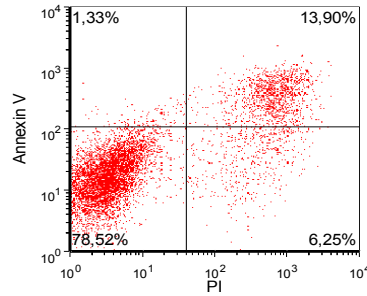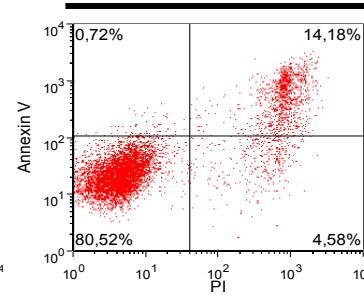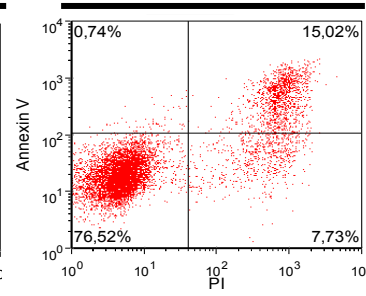

1.87

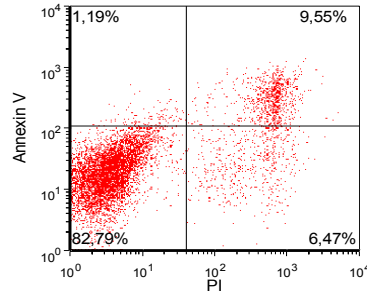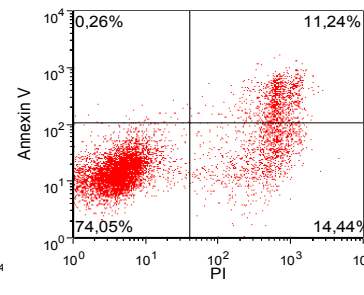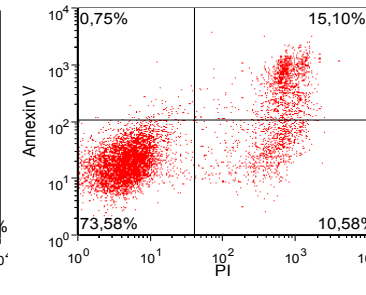

0.94

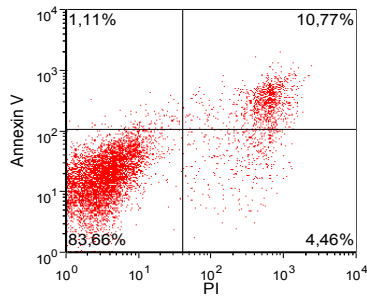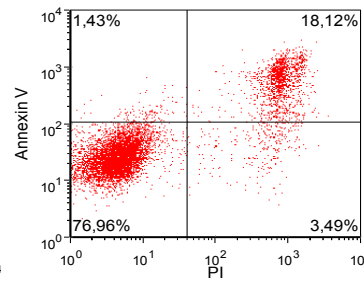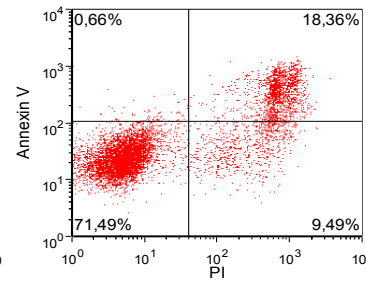

Pyrenocine A ( $\mu$ M)
